# Supplementary material for: Population Genetics of the Invasive Red Fox, Vulpes vulpes, in South-Eastern Australia
Source: MDPI journal article supplement (doi:10.3390/genes12050786), 2021-05-20
Supplement: s1 [file s1]

Supplementary Material:  
Figure S1:

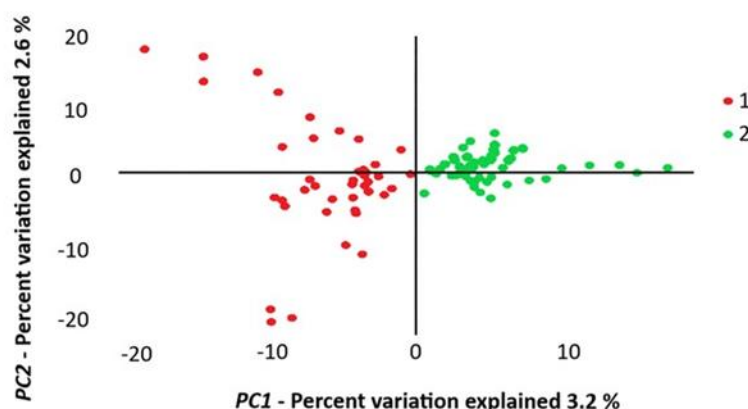

**Figure S1.** Principle Co-ordinate Analysis plot of genetic distances between two populations, *genetic cluster 1* and *genetic cluster 2*. PCoA between first and second axes covers 5.8 % of the variation in the data. Red points indicate membership to *genetic cluster 1* (N=42). Green points indicate membership to *genetic cluster 2* (N=51).

**Table S1:** Basic data that was provided with shot foxes, including coordinates where shot, approximate age, sex, weight, and condition of health.

| Variable    | Description                                                                                                                                                                                                |
|-------------|------------------------------------------------------------------------------------------------------------------------------------------------------------------------------------------------------------|
| Individual  | The number assigned to the individual for further analysis based on the chronological order that the fox was shot by the hunter.                                                                           |
| Date        | The date in DD/MM/YY format that the fox was shot.                                                                                                                                                         |
| Latitude    | Latitudinal coordinates that the fox was shot in degrees.                                                                                                                                                  |
| Longitude   | Longitudinal coordinates that the fox was shot in degrees.                                                                                                                                                 |
| Age (years) | The approximate age in years of the shot fox as estimated by the licensed hunter – opinion of the hunter based on age biology of the fox, distinguishing features based on age. Not provided for 14 foxes. |
| Sex         | The sex of the shot fox – Male or Female. Not provided for 14 foxes.                                                                                                                                       |
| Weight (kg) | The approximate weight of the shot fox in kilograms (kg). Not provided for 14 foxes.                                                                                                                       |
| Condition   | The visual condition of health that the shot fox was found in – opinion of the hunter based off presence of mange, excessive scarring due to fighting, size of the fox. Not provided for 14 foxes.         |

  

| Individual | Date    | Latitude  | Longitude | Weight (kg) | Age range (years) | Sex | Condition |
|------------|---------|-----------|-----------|-------------|-------------------|-----|-----------|
| 1          | 13/3/19 | -34.4861  | 150.3874  | -           | -                 | -   | -         |
| 2          | 13/3/19 | -34.49425 | 150.3905  | -           | -                 | -   | -         |
| 3          | 13/3/19 | -34.49805 | 150.3873  | -           | -                 | -   | -         |
| 4          | 13/3/19 | -34.49399 | 150.39164 | -           | -                 | -   | -         |
| 5          | 13/3/19 | -34.49386 | 150.39983 | -           | -                 | -   | -         |
| 6          | 1/5/19  | -34.5026  | 150.3823  | -           | -                 | -   | -         |
| 7          | 10/4/19 | -34.4948  | 150.3835  | -           | -                 | -   | -         |
| 8          | 10/4/19 | -34.4926  | 150.3948  | -           | -                 | -   | -         |
| 9          | 1/5/19  | -34.5016  | 150.3820  | -           | -                 | -   | -         |

| Individual | Date     | Latitude      | Longitude     | Weight (kg) | Age range (years) | Sex    | Condition |
|------------|----------|---------------|---------------|-------------|-------------------|--------|-----------|
| 10         | 1/5/19   | -34.4960      | 150.3853      | -           | -                 | -      | -         |
| 11         | 1/5/19   | -34.5024      | 150.3840      | -           | -                 | -      | -         |
| 12         | 1/5/19   | -34.4928      | 150.4090      | -           | -                 | -      | -         |
| 13         | 1/5/19   | -34.4940      | 150.3848      | -           | -                 | -      | -         |
| 14         | 1/5/19   | -34.4950      | 150.3825      | -           | -                 | -      | -         |
| 15         | 13/2/19  | -34.715785759 | 150.500489752 | 3.2         | <1                | Female | Good      |
| 16         | 13/2/19  | -34.715958893 | 150.496630691 | 3.5         | <1                | Male   | Good      |
| 17         | 13/2/19  | -34.719232436 | 150.512963361 | 3           | <1                | Female | Poor      |
| 18         | 13/2/19  | -34.718488354 | 150.513607968 | 5           | 2 to 3            | Male   | Excellent |
| 19         | 13/2/19  | -34.756547514 | 150.510009314 | 4           | <1                | Female | -         |
| 20         | 15/2/19  | -34.696793598 | 150.527977524 | 4.4         | 2 to 3            | Female | Good      |
| 21         | 15/2/19  | -34.691024941 | 150.533802714 | 2.1         | <1                | Female | Good      |
| 22         | 15/2/19  | -34.694413699 | 150.532425116 | 3.6         | 1 to 2            | Male   | Excellent |
| 23         | 15/2/19  | -34.694134817 | 150.534234315 | 6.1         | 2 to 3            | Male   | Excellent |
| 24         | 19/2/19  | -34.735818913 | 150.512040333 | 3.6         | 1 to 2            | Female | Good      |
| 25         | 19/2/19  | -34.721513995 | 150.537395499 | 5.8         | 2 to 3            | Male   | Good      |
| 26         | 25/2/19  | -34.839770162 | 150.575043027 | 6.2         | 2 to 3            | Male   | Excellent |
| 27         | 2/3/19   | -34.695051931 | 150.605503027 | 5.5         | 2 to 3            | Female | Good      |
| 28         | 8/3/19   | -35.060248839 | 150.555129795 | 4.5         | 1 to 2            | Male   | Good      |
| 29         | 8/3/19   | -34.810695990 | 150.645171468 | 7.1         | 4 to 5            | Male   | Good      |
| 30         | 8/3/19   | -34.807431500 | 150.649778435 | 6.5         | 2 to 3            | Male   | Good      |
| 31         | 8/3/19   | -34.811650250 | 150.646499685 | 2.5         | <1                | Male   | Good      |
| 32         | 8/3/19   | -34.810182120 | 150.648432387 | 5           | 2 to 3            | Female | Fair      |
| 33         | 10/3/19  | -34.724637610 | 150.647026137 | 4.5         | 1 to 2            | Female | Good      |
| 34         | 10/3/19  | -34.735562430 | 150.627900497 | 5.1         | 3 to 4            | Male   | Fair      |
| 35         | 10/3/19  | -34.739410854 | 150.577041464 | 3.5         | 1 to 2            | Female | Good      |
| Individual | Date     | Latitude      | Longitude     | Weight (kg) | Age range (years) | Sex    | Condition |
| 36         | 4/5/19   | -34.811567249 | 150.652000072 | 6.1         | 3 to 4            | Male   | Excellent |
| 37         | 5/5/19   | -34.418635680 | 150.814940020 | 3.8         | 1 to 2            | Male   | Poor      |
| 38         | 7/5/19   | -34.746362713 | 150.530902177 | 2.6         | 1 to 2            | Female | Poor      |
| 39         | 7/5/19   | -34.736185747 | 150.584867249 | 7           | 4 to 5            | Male   | Excellent |
| 40         | 7/5/19   | -34.740752446 | 150.577865027 | 4.5         | 1 to 2            | Male   | Good      |
| 41         | 7/5/19   | -34.739471218 | 150.579169247 | 3.5         | 1 to 2            | Female | Good      |
| 42         | 7/5/19   | -34.737881038 | 150.576725771 | 6           | 3 to 4            | Male   | Good      |
| 43         | 7/5/19   | -34.744757205 | 150.535307583 | 4.2         | 1 to 2            | Female | Fair      |
| 44         | 7/5/19   | -34.748229281 | 150.531370844 | 6.8         | 3 to 4            | Male   | Excellent |
| 45         | 16/5/19  | -34.745615494 | 150.526512174 | 6.3         | 3 to 4            | Male   | Excellent |
| 46         | 25/9/19  | -34.853583221 | 150.447051376 | 5.1         | 1 to 2            | Male   | Good      |
| 47         | 29/10/19 | -34.419417243 | 150.814277788 | 1           | <1                | Male   | Good      |
| 48         | 29/10/19 | -34.419417243 | 150.814277788 | 1           | <1                | Female | Good      |
| 49         | 29/10/19 | -34.419417243 | 150.814277788 | 0.8         | <1                | Male   | Good      |
| 50         | 2/11/19  | -34.715252112 | 150.539797492 | 6.7         | 3 to 4            | Male   | Good      |
| 51         | 2/11/19  | -34.730950245 | 150.533271811 | 5.4         | 2 to 3            | Female | Good      |
| 52         | 2/11/19  | -34.728835783 | 150.534361075 | 6.2         | 3 to 4            | Male   | Excellent |
| 53         | 9/11/19  | -34.752005469 | 150.556783833 | 3.4         | 1 to 2            | Female | Good      |
| 54         | 9/11/19  | -34.750388224 | 150.558852082 | 1.2         | <1                | Male   | Good      |
| 55         | 20/11/19 | -34.678404434 | 150.591043014 | 6.5         | 4 to 5            | Male   | Excellent |
| 56         | 22/11/19 | -34.676148024 | 150.599587367 | 1.1         | <1                | Female | Good      |
| 57         | 22/11/19 | -34.675798320 | 150.598768119 | 6.2         | 4 to 5            | Male   | Fair      |
| 58         | 22/11/19 | -34.672290065 | 150.600986345 | 4.5         | 1 to 2            | Female | Good      |
| 59         | 22/11/19 | -34.668572384 | 150.603101296 | 2           | <1                | Male   | Excellent |
| 60         | 22/11/19 | -34.681196007 | 150.611948086 | 4           | 1 to 2            | Female | Good      |
| 61         | 22/11/19 | -34.682811770 | 150.612512819 | 0.8         | <1                | Male   | Good      |
| Individual | Date     | Latitude      | Longitude     | Weight (kg) | Age range (years) | Sex    | Condition |
| 62         | 13/12/19 | -34.763070016 | 150.498376300 | 1.2         | <1                | Male   | Good      |
| 63         | 13/12/19 | -34.763192880 | 150.502163099 | 1.3         | <1                | Male   | Good      |
| 64         | 13/12/19 | -34.736014354 | 150.512340234 | 4.7         | 1 to 2            | Female | Good      |
| 65         | 13/12/19 | -34.726470776 | 150.544913507 | 1.2         | <1                | Female | Good      |
| 66         | 8/7/19   | -34.883224772 | 150.623105173 | 7.8         | >5                | Male   | Excellent |
| 67         | 8/7/19   | -34.883803827 | 150.621830394 | 6.3         | 3 to 4            | Male   | Good      |
| 68         | 8/7/19   | -34.876168479 | 150.610356705 | 6.5         | 3 to 4            | Male   | Excellent |
| 69         | 8/7/19   | -34.872396263 | 150.625790686 | 7           | 4 to 5            | Male   | Good      |
| 70         | 27/12/19 | -34.727150425 | 150.544194583 | 1.5         | <1                | Male   | Good      |

| 71         | 27/12/19 | -34.726366450 | 150.535733790 | 6.5         | 3 to 4            | Male   | Good      |
|------------|----------|---------------|---------------|-------------|-------------------|--------|-----------|
| 72         | 27/12/19 | -34.727162263 | 150.543440820 | 4.1         | 1 to 2            | Female | Good      |
| 73         | 27/12/19 | -34.720944757 | 150.534213360 | 6.5         | 3 to 4            | Male   | Excellent |
| 74         | 21/1/20  | -34.871288072 | 150.615234279 | 4.6         | <1                | Female | Good      |
| 75         | 21/1/20  | -34.877910890 | 150.618291845 | 5           | 2 to 3            | Male   | Good      |
| 76         | 21/1/20  | -34.885543780 | 150.625521791 | 3.9         | <1                | Male   | Good      |
| 77         | 21/1/20  | -34.884875482 | 150.626383414 | 3.5         | <1                | Male   | Good      |
| 78         | 25/1/20  | -34.736302652 | 150.512331589 | 4.4         | <1                | Male   | Good      |
| 79         | 25/1/20  | -34.724847996 | 150.527535271 | 4.6         | <1                | Male   | Good      |
| 80         | 25/1/20  | -34.731094556 | 150.529718681 | 6.5         | 2 to 3            | Male   | Excellent |
| 81         | 25/1/20  | -34.716814158 | 150.538135391 | 3           | <1                | Male   | Good      |
| 82         | 28/1/20  | -34.890804164 | 150.505197237 | 4.8         | <1                | Male   | Good      |
| 83         | 28/1/20  | -34.893647339 | 150.506249091 | 5           | <1                | Male   | Good      |
| 84         | 30/1/20  | -34.881947918 | 150.486638402 | 4.8         | 1 to 2            | Male   | Good      |
| 85         | 4/2/20   | -34.717737648 | 150.512604190 | 4.1         | 1 to 2            | Female | Good      |
| 86         | 4/2/20   | -34.735404899 | 150.543589897 | 4.2         | 1 to 2            | Female | Fair      |
| 87         | 4/2/20   | -34.739489553 | 150.544528245 | 4.5         | 2 to 3            | Female | Good      |
| Individual | Date     | Latitude      | Longitude     | Weight (kg) | Age range (years) | Sex    | Condition |
| 88         | 4/2/20   | -34.725439711 | 150.552357881 | 3.5         | <1                | Male   | Excellent |
| 89         | 13/2/20  | -34.736493050 | 150.511943674 | 6           | 3 to 4            | Male   | Excellent |
| 90         | 20/2/20  | -34.920093973 | 150.386539111 | 3           | <1                | Female | Good      |
| 91         | 24/2/20  | -34.716064113 | 150.498679995 | 3.5         | <1                | Male   | Excellent |
| 92         | 24/2/20  | -34.718958770 | 150.498723788 | 4           | <1                | Female | Good      |
| 93         | 25/2/20  | -34.737710645 | 150.511972676 | 4           | <1                | Female | Good      |
| 94         | 28/2/20  | -34.751638949 | 150.556488809 | 5.9         | 3 to 4            | Male   | Fair      |

**Table S2.** Results from association analysis on PLINK. *SNP ID* refers to the SNP identifier supplied from DArTseq. *Poly-morphism* refers to the alternate and SNP genotypes. *Minor allele* refers to the allele with the lower allele frequency in the total population. *Allele frequency – population 1* refers to the allele frequency for the genotypes of foxes in *genetic cluster 1*. *Allele frequency – population 2* refers to the allele frequency for the genotypes of foxes in *genetic cluster 2*. *p-value* refers to the significant p-value of the test with Bonferroni correction ( $p < 0.0001$ ). \*\*\* =  $p < 0.0001$ .

| SNP ID           | Polymorphism | Minor allele | Allele frequency –<br><i>population 1</i> | Allele frequency –<br><i>population 2</i> | p-value |
|------------------|--------------|--------------|-------------------------------------------|-------------------------------------------|---------|
| 10725763-16-G/C  | G/C          | C            | 0.3611                                    | 0                                         | ***     |
| 10723124-30-T/C  | T/C          | C            | 0.6111                                    | 0.125                                     | ***     |
| 100009517-51-T/G | T/G          | G            | 0.7222                                    | 0.2024                                    | ***     |
| 57022061-8-C/T   | C/T          | C            | 0.4706                                    | 0.06818                                   | ***     |
| 10712442-5-C/A   | C/A          | A            | 0.2778                                    | 0                                         | ***     |
| 100016951-23-C/T | C/T          | T            | 0.4444                                    | 0.05814                                   | ***     |
| 45537018-48-G/A  | G/A          | A            | 0.1111                                    | 0.6136                                    | ***     |
| 57022555-47-C/T  | C/T          | C            | 0.7222                                    | 0.2386                                    | ***     |
| 100027824-14-C/T | C/T          | T            | 0.3056                                    | 0.01136                                   | ***     |
| 10715172-47-G/T  | G/T          | G            | 0.3056                                    | 0.01136                                   | ***     |
| 57020395-40-C/T  | C/T          | T            | 0.3611                                    | 0.03409                                   | ***     |
| 100022293-24-G/C | G/C          | C            | 0.3333                                    | 0.02326                                   | ***     |
| 45541004-6-C/T   | C/T          | T            | 0.2941                                    | 0.01163                                   | ***     |
| 100035282-6-G/C  | G/C          | C            | 0.25                                      | 0                                         | ***     |
| 45544731-33-T/G  | T/G          | G            | 0.5                                       | 0.1047                                    | ***     |
| 45544731-33-T/G  | T/G          | G            | 0.5                                       | 0.1047                                    | ***     |
| 17675565-12-A/G  | A/G          | G            | 0.6944                                    | 0.2386                                    | ***     |
| 45533640-16-G/A  | G/A          | A            | 0.7222                                    | 0.2614                                    | ***     |
| 45536391-35-G/A  | G/A          | A            | 0.4444                                    | 0.07955                                   | ***     |
